# Supplementary material for: Global, regional and national burden of colorectal cancer and its risk factors, 1990-2021: a systematic analysis for the GBD 2021
Source: Research Square preprint supplement (doi:10.21203/rs.3.rs-5376554/v1), 2024-12-02
Supplement: Supplementary file 1 [file 1b537ffb9e0226a55c01288d.docx]

Supplemetary Online Content

eTable 1 Incidence of CRC between 1990 and 2021 at the Global and Regional Level.

eTable 2 Deaths of CRC between 1990 and 2021 at the Global and Regional Level.

eTable 3 DALYs of CRC between 1990 and 2021 at the Global and Regional Level.

eTable 4 Incidence of CRC Between 1990 and 2021 at the 204 Countries and Territories Level

eTable 5 Deaths of CRC Between 1990 and 2021 at the 204 Countries and Territories Level

eTable 6 DALYs of CRC Between 1990 and 2021 at the 204 Countries and Territories Level
